# Supplementary material
Source: Springer Nature journal article supplement (https://www.springermedizin.de/resource/supplementary/12874_2007_220_MOESM2_ESM.pdf/9434022)

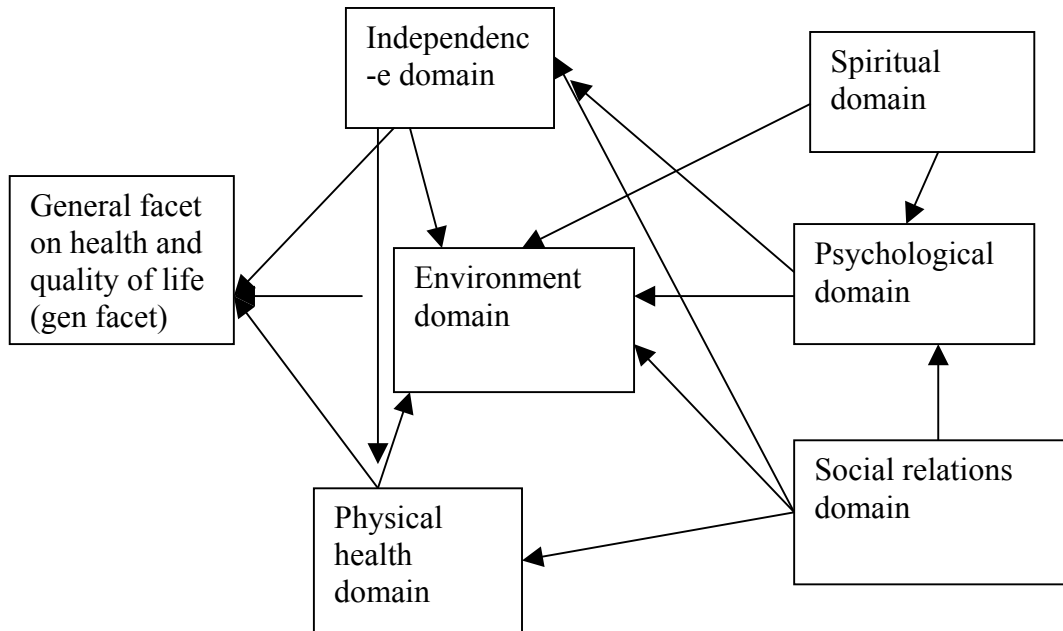

Supplement: MOESM2 [file 9434022]
